# Supplementary material for: Formation of hexaarylbiimidazole heterodimers via the cross recombination of two lophyl radicals
Source: Royal Society of Chemistry journal article supplement (doi:10.1039/b823277f), 2009-01-01
Supplement: b823277f.pdf [file b823277f.pdf]

Supporting Information for

## Formation of hexaarylbiimidazole heterodimers via cross recombination of two lophyl radicals

Atsushi Kimoto, Shimpei Niitsu, Fumiyasu Iwahori and Jiro Abe\*

Department of Chemistry, School of Science and Engineering, Aoyama Gakuin University, 5-10-1  
Fuchinobe, Sagami-hara, Kanagawa

### Investigation $R_f$ values of homo-HABI derivatives.

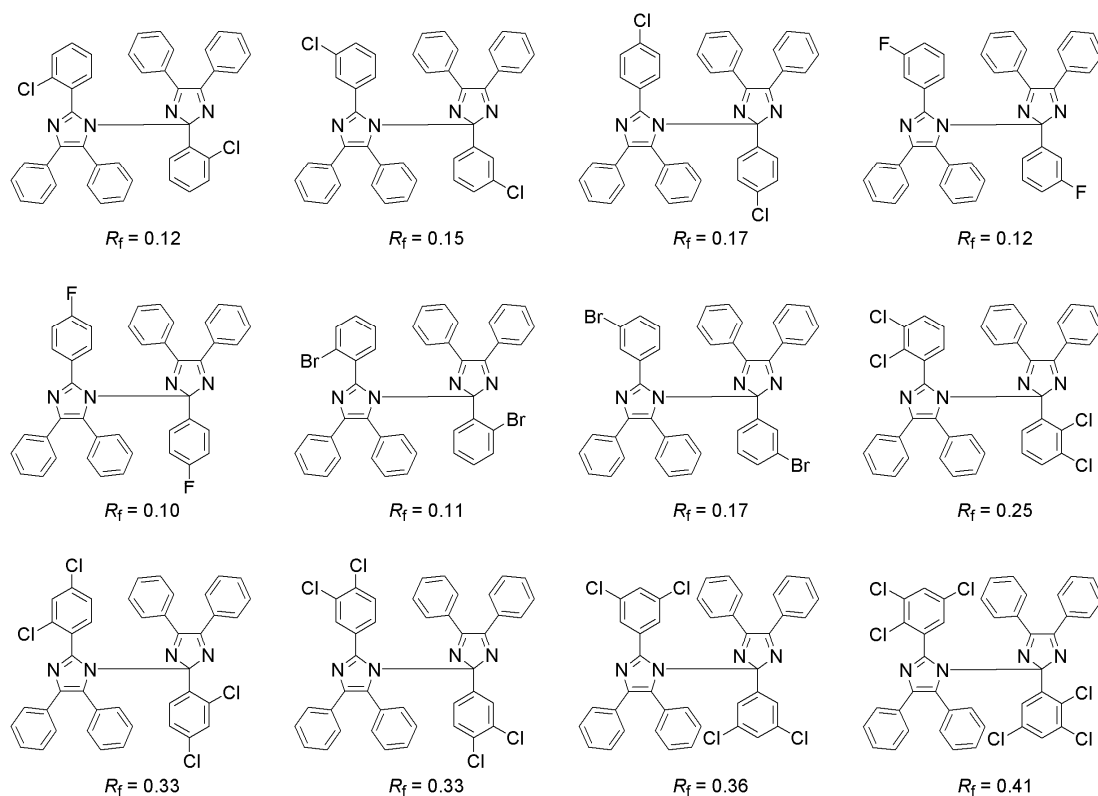

**Fig. S1** Chemical structures and the  $R_f$  values (SiO<sub>2</sub> TLC) in chloroform of various HABI derivatives.

We checked  $R_f$  values of HABI derivatives shown above. We prepared these HABIs by a literature procedures,<sup>1</sup> and checked their  $R_f$  values in chloroform. We have chosen *o*-Cl-HABI (**1-1**) and 2,3,5-triCl-HABI (**2-2**) because they showed the most different  $R_f$  values in chloroform.

### **X-ray Crystallographic Analysis.**

The diffraction data of the single crystal of HABI derivatives was collected on the Bruker APEX II CCD area detector (MoK $\alpha$ ,  $\lambda = 0.71073$  nm). During the data collection, the lead glass doors of the diffractometer were covered to exclude the room light. The data refinement was carried out by the Bruker APEXII software package with SHELXT program.<sup>2</sup> All non-hydrogen atoms were anisotropically refined.

From the X-ray crystallographic analysis (Fig. S2-S5), we found the C–N bond connecting two imidazolyl rings is formed between N1 and C2 (1,2'-isomer), which can generally be found in other HABI derivatives and The C-N bond lengths of these four HABIs are almost the same (**1-1**: 1.484 Å, **1-2**: 1.477 Å, **2-1**: 1.475 Å, and **2-2**: 1.476 Å, respectively). Crystallographic parameters of four HABI derivatives are shown in Table S1 and S2.

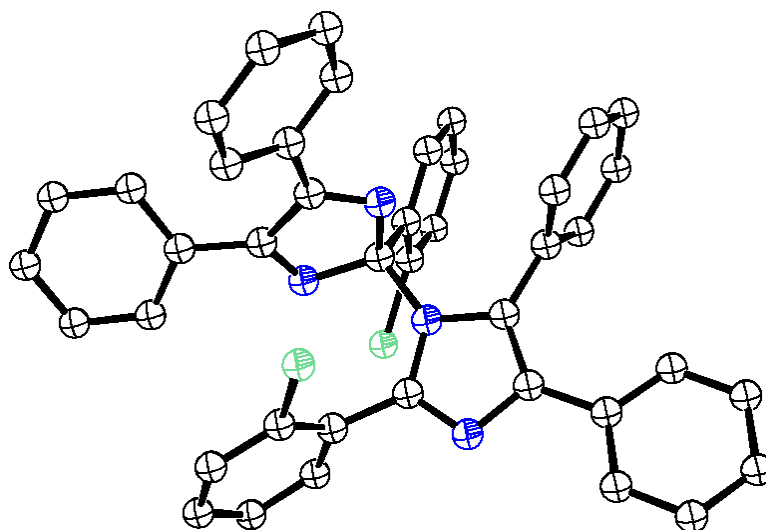

**Fig. S2** Crystal structure of **1-1** (50% probability).

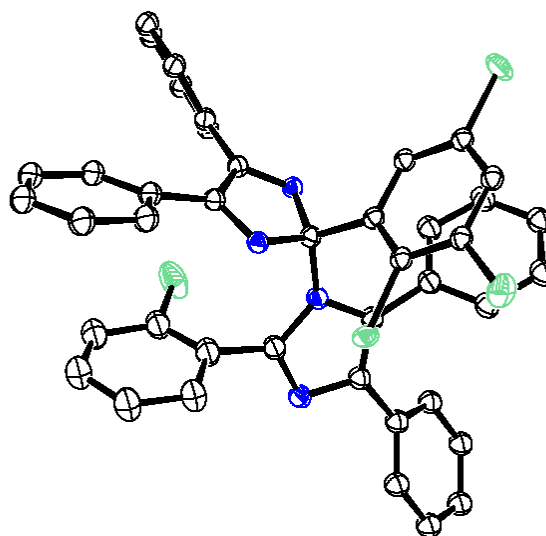

**Fig. S3** Crystal structure of **1-2** (50% probability).

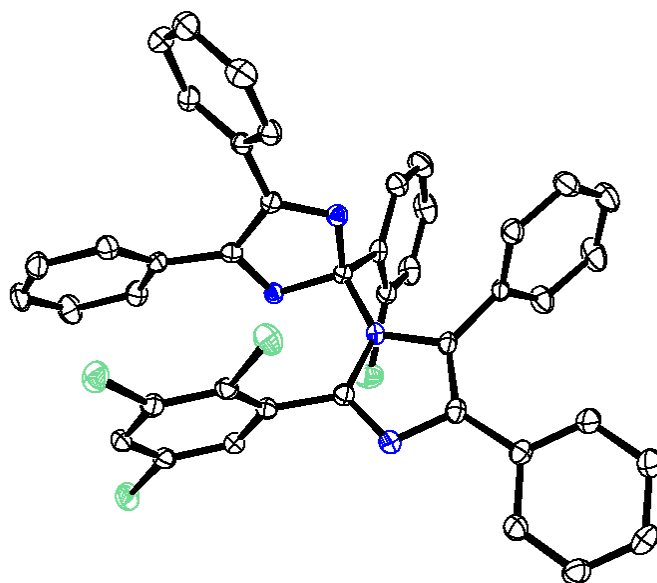

**Fig. S4** Crystal structure of 2-1 (50% probability).

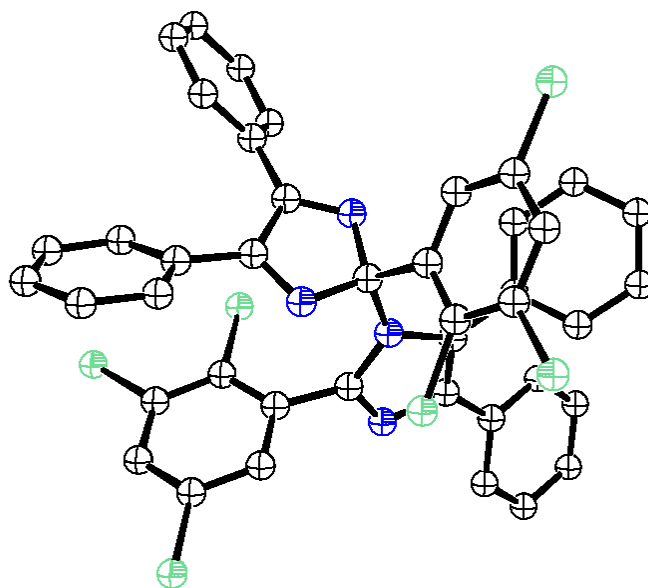

**Fig. S5** Crystal structure of 2-2 (50% probability).

**Table S1** Crystallographic parameters of **1-1** and **1-2**.

|                                         | <b>1-1</b>         | <b>1-2</b>         |
|-----------------------------------------|--------------------|--------------------|
| Empirical formula                       | C42 H28 Cl2 N4     | C42 H26 Cl4 N4     |
| Formula weight                          | 659.58             | 728.47             |
| Temperature, K                          | 103(2)             | 103                |
| Crystal system                          | orthorhombic       | orthorhombic       |
| Space group                             | Pbca               | Pbca               |
| <i>a</i> , Å                            | 16.7314(2)         | 16.1217(4)         |
| <i>b</i> , Å                            | 17.3877(3)         | 12.4587(3)         |
| <i>c</i> , Å                            | 46.0307(6)         | 34.4958(10)        |
| $\alpha$ , degree                       | 90.00              | 90                 |
| $\beta$ , degree                        | 90.00              | 90                 |
| $\gamma$ , degree                       | 90.00              | 90                 |
| Volume, Å <sup>3</sup>                  | 13391.3(3)         | 6928.7(3)          |
| <i>Z</i>                                | 16                 | 8                  |
| Density (calculated), Mg/m <sup>3</sup> | 1.309              | 1.397              |
| Crystal size, mm <sup>3</sup>           | 0.32 × 0.30 × 0.08 | 0.30 × 0.20 × 0.05 |
| $\lambda$ (Mo K $\alpha$ ), Å           | 0.71073            | 0.71073            |
| Reflections collected                   | 123308             | 53043              |
| Independent reflections                 | 19426              | 6337               |
| G.O.F.                                  | 1.005              | 1.012              |
| <i>R</i> <sub>1</sub>                   | 0.0409             | 0.0708             |
| <i>wR</i> <sub>2</sub>                  | 0.0924             | 0.1555             |

**Table S2** Crystallographic parameters of **2-1** and **2-2**.

|                                         | <b>2-1</b>         | <b>2-2</b>         |
|-----------------------------------------|--------------------|--------------------|
| Empirical formula                       | C42 H26 Cl4 N4     | C54 H36 Cl6 N4     |
| Formula weight                          | 728.47             | 953.57             |
| Temperature, K                          | 103                | 103(2)             |
| Crystal system                          | monoclinic         | monoclinic         |
| Space group                             | P2(1)/n            | P2(1)/n            |
| <i>a</i> , Å                            | 12.350(2)          | 17.8938(4)         |
| <i>b</i> , Å                            | 15.981(3)          | 14.1917(3)         |
| <i>c</i> , Å                            | 18.000(3)          | 18.1886(3)         |
| $\alpha$ , degree                       | 90                 | 90.00              |
| $\beta$ , degree                        | 107.400(2)         | 97.6160(10)        |
| $\gamma$ , degree                       | 90                 | 90.00              |
| Volume, Å <sup>3</sup>                  | 3390.0(10)         | 4578.13(16)        |
| <i>Z</i>                                | 4                  | 4                  |
| Density (calculated), Mg/m <sup>3</sup> | 1.427              | 1.383              |
| Crystal size, mm <sup>3</sup>           | 0.30 × 0.20 × 0.20 | 0.20 × 0.16 × 0.16 |
| $\lambda$ (Mo K $\alpha$ ), Å           | 0.71073            | 0.71073            |
| Reflections collected                   | 18776              | 81831              |
| Independent reflections                 | 7669               | 16461              |
| G.O.F.                                  | 1.003              | 1.025              |
| <i>R</i> <sub>1</sub>                   | 0.0451             | 0.0435             |
| <i>wR</i> <sub>2</sub>                  | 0.1442             | 0.1007             |

## References

- (1) (a) K. Fujita, S. Hatano, D. Kato, J. Abe, *Org. Lett.* 2008, **10**, 3105. (b) S. Hatano, J. Abe, *J. Phys. Chem. A* 2008, **112**, 6098. (c) Y. Miyamoto, A. Kikuchi, F. Iwahori, J. Abe, *J. Phys. Chem. A* 2005, **109**, 10183.
- (2) (a) Sheldrick GM. SHELXS-97 and SHELXL-97 1997; University of Gottingen, Germany. (b) Sheldrick GM. SADABS 1996; University of Gottingen, Germany.
